# Supplementary material for: Contribution of 100% Fruit Juice to Micronutrient Intakes in the United States, United Kingdom and Brazil
Source: PubMed Central journal article supplement (PMC7282014; doi:10.3390/nu12051258), 2020-04-28
Supplement: nutrients-12-01258-s001.pdf [file nutrients-12-01258-s001.pdf]

## Supplementary Materials:

**Supplementary Table S1:** 100% fruit juice food code list for the U.S.

| Food code | Description                                                            |
|-----------|------------------------------------------------------------------------|
| 61201010  | Grapefruit juice, 100%, freshly squeezed                               |
| 61201020  | Grapefruit juice, 100%, NS as to form                                  |
| 61201220  | Grapefruit juice, 100%, canned, bottled or in a carton                 |
| 61201225  | Grapefruit juice, 100%, with calcium added                             |
| 61201620  | Grapefruit juice, 100%, frozen, reconstituted                          |
| 61204000  | Lemon juice, 100%, NS as to form                                       |
| 61204010  | Lemon juice, 100%, freshly squeezed                                    |
| 61204200  | Lemon juice, 100%, canned or bottled                                   |
| 61207000  | Lime juice, 100%, NS as to form                                        |
| 61207010  | Lime juice, 100%, freshly squeezed                                     |
| 61207200  | Lime juice, 100%, canned or bottled                                    |
| 61210000  | Orange juice, 100%, NFS                                                |
| 61210010  | Orange juice, 100%, freshly squeezed                                   |
| 61210220  | Orange juice, 100%, canned, bottled or in a carton                     |
| 61210250  | Orange juice, 100%, with calcium added, canned, bottled or in a carton |
| 61210620  | Orange juice, 100%, frozen, reconstituted                              |
| 61210720  | Orange juice, 100%, frozen, not reconstituted                          |
| 61210820  | Orange juice, 100%, with calcium added, frozen, reconstituted          |
| 61213220  | Tangerine juice, 100%                                                  |
| 61213800  | Fruit juice blend, citrus, 100% fruit juice                            |
| 61213900  | Fruit juice blend, citrus, 100% fruit juice, with calcium added        |
| 64100100  | Fruit juice, NFS                                                       |
| 64100110  | Fruit juice blend, 100% fruit juice                                    |
| 64100200  | Cranberry juice blend, 100% fruit juice                                |

|          |                                                              |
|----------|--------------------------------------------------------------|
| 64100220 | Cranberry juice blend, 100% fruit juice, with calcium added  |
| 64101010 | Apple cider                                                  |
| 64104010 | Apple juice, 100%                                            |
| 64104030 | Apple juice, 100%, with calcium added                        |
| 64104600 | Blackberry juice, 100%                                       |
| 64105400 | Cranberry juice, 100%, not a blend                           |
| 64116020 | Grape juice, 100%                                            |
| 64116060 | Grape juice, 100%, with calcium added                        |
| 64120010 | Papaya juice, 100%                                           |
| 64121000 | Passion fruit juice, 100%                                    |
| 64124020 | Pineapple juice, 100%                                        |
| 64126000 | Pomegranate juice, 100%                                      |
| 64132010 | Prune juice, 100%                                            |
| 64132500 | Strawberry juice, 100%                                       |
| 64133100 | Watermelon juice, 100%                                       |
| 67202000 | Apple juice, baby food                                       |
| 67202010 | Apple juice, with added calcium, baby food                   |
| 67203000 | Apple-fruit juice blend, baby food                           |
| 67203200 | Apple-banana juice, baby food                                |
| 67203400 | Apple-cherry juice, baby food                                |
| 67203500 | Apple-grape juice, baby food                                 |
| 67203600 | Apple-peach juice, baby food                                 |
| 67203700 | Apple-prune juice, baby food                                 |
| 67203800 | Grape juice, baby food                                       |
| 67204000 | Mixed fruit juice, not citrus, baby food                     |
| 67204100 | Mixed fruit juice, not citrus, with added calcium, baby food |
| 67205000 | Orange juice, baby food                                      |

|          |                                      |
|----------|--------------------------------------|
| 67211000 | Orange-apple-banana juice, baby food |
| 67212000 | Pear juice, baby food                |

**Supplementary Table S2: 100% fruit juice food code list for the UK.**

| <b>Food Code</b> | <b>Food Description</b>                                  |
|------------------|----------------------------------------------------------|
| 2317             | APPLE JUICE UNSWEETENED CANNED                           |
| 2318             | APPLE JUICE UNSWEETENED CARTONS PASTEURISED              |
| 2319             | APPLE JUICE UNSWEETENED UHT                              |
| 2328             | GRAPEFRUIT JUICE UNSWEETENED CANNED                      |
| 2329             | GRAPEFRUIT JUICE UNSWEETENED PASTEURISED                 |
| 2330             | GRAPEFRUIT JUICE UNSWEETENED UHT                         |
| 2336             | ORANGE JUICE UNSWEETENED CANNED                          |
| 2337             | ORANGE JUICE UNSWEETENED PASTURISED                      |
| 2338             | ORANGE JUICE UNSWEETENED AMBIENT / UHT                   |
| 2339             | ORANGE JUICE FRESHLY SQUEEZED JUICE                      |
| 2343             | PINEAPPLE JUICE UNSWEETENED CANNED                       |
| 2344             | PINEAPPLE JUICE UNSWEETENED PASTEURISED                  |
| 2345             | PINEAPPLE JUICE UNSWEETENED UHT                          |
| 8604             | MANGO JUICE FRESH                                        |
| 8640             | PRUNE JUICE BOTTLED UNSWEETENED                          |
| 9350             | REDCURRANT JUICE FRESH                                   |
| 10209            | BLUEBERRY, APPLE AND GRAPE FRUIT JUICE 100% FRUIT JUICE  |
| 10285            | APPLE AND BLACKCURRANT FRUIT JUICE, NOT FROM CONCENTRATE |
| 10366            | ORANGE JUICE PASTEURISED FORTIFIED WITH CALCIUM          |
| 8114             | POMEGRANATE JUICE PURCHASED FORTIFIED                    |
| 8450             | MIXED FRUIT JUICE CANNED UNSWEETENED 100% FRUIT JUICE    |
| 9186             | APPLE/PEAR JUICE CONCENTRATE UNSWEETENED                 |
| 10483            | VITAFIT MULTIVITAMIN 11 FRUIT JUICE                      |

---

|      |                                                            |
|------|------------------------------------------------------------|
| 2357 | MIXED FRUIT JUICE PASTEURISED                              |
| 2359 | FROZEN ORANGE JUICE CONCENTRATE                            |
| 2360 | FROZEN ORANGE JUICE CONCENTRATE MADE UP                    |
| 8082 | FRUIT JUICE FORTIFIED WITH MULTIVITAMINS                   |
| 7892 | BABY PURE FRUIT JUICE CONCENTRATE FORTIFIED WITH VITAMIN C |
| 2096 | PASSION FRUIT RAW JUICE ONLY                               |
| 2132 | POMEGRANATE RAW JUICE ONLY                                 |
| 4359 | INFANT AND TODDLER PURE FRUIT JUICE WITH ADDED VITAMIN C,  |

---

**Supplementary Table S3: 100% fruit juice food code list for Brazil.**

| <b>Food Code</b> | <b>Description (Brazilian)</b> | <b>Description (English Translation)</b>          |
|------------------|--------------------------------|---------------------------------------------------|
| 8507901          | SUCO ORGANICO                  | Orange, juice, fresh                              |
| 8507907          | SUCO DE LARANJA ORGANICO       | Orange, juice, fresh                              |
| 8500401          | SUCO                           | Orange, juice, fresh                              |
| 8500402          | SUCO DE ABACAXI                | Pineapple, juice, plain, purchased ready-to-drink |
| 8500403          | SUCO DE ACEROLA                | Acerola juice                                     |
| 8500407          | SUCO DE LARANJA                | Orange, juice, fresh                              |
| 8500408          | SUCO DE LARANJA COM BANANA     | Orange, juice, orange-banana                      |
| 8500412          | SUCO DE MAMAO                  | Papaya juice                                      |
| 8500414          | SUCO DE MARACUJA               | Passion fruit, juice                              |
| 8500415          | SUCO DE MELAO                  | Watermelon juice                                  |
| 8500416          | SUCO DE MORANGO                | Strawberry juice                                  |
| 8507902          | SUCO DE ABACAXI ORGANICO       | Pineapple, juice, plain, purchased ready-to-drink |
| 8507903          | SUCO DE ACEROLA ORGANICO       | Acerola juice                                     |
| 8507914          | SUCO DE MARACUJA ORGANICO      | Passion fruit, juice                              |
| 8507916          | SUCO DE MORANGO ORGANICO       | Strawberry juice                                  |

**Supplementary Table S4:** Frequency of 100% FJ Intake and Amount of 100% FJ Consumed: Results from NHANES 2013-2014.

| Population Group (age, years) | Consumption of 100% juice on EITHER day of the 2-day survey |                             |                   |             | Consumption of 100% juice on ONLY Day 1 of the 2-day survey |                  |                   |             | Consumption of 100% juice on BOTH days of the 2-day survey (BOTH Days 1 and 2) |                  |                   |             |
|-------------------------------|-------------------------------------------------------------|-----------------------------|-------------------|-------------|-------------------------------------------------------------|------------------|-------------------|-------------|--------------------------------------------------------------------------------|------------------|-------------------|-------------|
|                               | Number                                                      | % users (of total surveyed) | Mean Intake (g/d) | SEM (g/day) | Number                                                      | % of total users | Mean Intake (g/d) | SEM (g/day) | Number                                                                         | % of total users | Mean Intake (g/d) | SEM (g/day) |
| Children (<1.5)               | 123                                                         | 51.85                       | 139.14            | 15.80       | 29                                                          | 32.72            | 136.17            | 20.58       | 73                                                                             | 47.63            | 205.99            | 20.10       |
| Children (1.5 to 2)           | 159                                                         | 66.76                       | 177.73            | 12.20       | 40                                                          | 22.62            | 181.65            | 23.50       | 84                                                                             | 50.59            | 243.98            | 17.82       |
| Children (3 to 9)             | 599                                                         | 59.42                       | 193.08            | 8.51        | 148                                                         | 27.34            | 216.99            | 10.92       | 279                                                                            | 44.15            | 267.63            | 18.94       |
| Children (10 to 12)           | 227                                                         | 47.84                       | 181.85            | 13.27       | 59                                                          | 28.17            | 221.86            | 13.57       | 76                                                                             | 33.17            | 273.93            | 21.36       |
| Male Teens (13 to 19)         | 189                                                         | 41.42                       | 222.60            | 28.82       | 71                                                          | 35.65            | 375.62            | 32.60       | 46                                                                             | 21.95            | 428.83            | 58.27       |
| Female Teens (13 to 19)       | 177                                                         | 26.44                       | 165.44            | 15.37       | 64                                                          | 33.72            | 285.85            | 42.80       | 38                                                                             | 21.62            | 287.91            | 50.84       |
| Male Young Adults             | 416                                                         | 26.08                       | 217.16            | 12.82       | 155                                                         | 34.58            | 323.40            | 27.00       | 103                                                                            | 29.32            | 332.24            | 33.69       |

|                                |      |       |        |       |     |       |        |       |      |       |        |       |
|--------------------------------|------|-------|--------|-------|-----|-------|--------|-------|------|-------|--------|-------|
| (20 to 59)                     |      |       |        |       |     |       |        |       |      |       |        |       |
| Female Young Adults (20 to 59) | 476  | 28.96 | 161.67 | 10.53 | 182 | 37.18 | 204.08 | 11.47 | 111  | 25.17 | 307.32 | 29.17 |
| Male Older Adults (60+)        | 230  | 31.72 | 182.39 | 11.82 | 66  | 29.81 | 226.20 | 18.96 | 93   | 45.75 | 272.11 | 13.33 |
| Female Older Adults (60+)      | 282  | 34.92 | 158.45 | 14.02 | 71  | 25.83 | 177.18 | 20.20 | 113  | 45.54 | 207.08 | 14.50 |
| Total Population (0+)          | 2878 | 34.16 | 183.87 | 3.97  | 885 | 31.74 | 243.71 | 7.93  | 1016 | 34.61 | 280.69 | 8.57  |
